# Supplementary material for: Synthesis and structure of [Zn(OMe)(L)]·[Zn(OH)(L)]·2(BPh4), L = cis,cis-1,3,5-tris[(E,E)-3-(2-furyl)acrylideneamino]cyclohexane: structural models of carbonic anhydrase and liver alcohol dehydrogenase
Source: Royal Society of Chemistry journal article supplement (doi:10.1039/b302895j), 2003-01-01
Supplement: b302895j.doc [file b302895j.doc]

**Synthesis of Complex (1)**

A solution of zinc(II) perchlorate hydrate (0.042 g, 0.113 mmol) in ethanol (10 cm3) was degassed on a Schlenk line and then placed under an argon atmosphere. To this, a solution of *cis,cis*-1,3,5-tris[(*E,E*)-3-(2-furyl)prop-2-en-1-ylideneamino]cyclohexane (0.050 g, 0.113 mmol) in ethanol (10 cm3) under argon was added via a cannula . The solution was then stirred and a solution of NaBPh4 (0.039g, 0.113 mmol) in ethanol under argon (5 cm3) was added via a cannula. The solution then precipitated the perchlorate complex as a yellow solid which was isolated and dried *in vacuo*. The perchlorate salt was then dissolved in minimum degassed dichloromethane (*ca.* 2 cm3). Then a suspension of potassium hydroxide, (0.007 g, 0.125 mmol) sonicated in dichloromethane (10 cm3) under argon was added to the yellow solution via cannula. This gave a colour change of the solution from yellow to clear. On stirring for ½ h the solution precipitated a small amount of a white solid and this was filtered off under argon using a filter frit cannula (the white solid was identified as an inorganic perchlorate salt by infra-red). The remaining solution was the reduced *in* *vacuo* to dryness giving a white powder, (0.075 g, 0.0890 mmol, 73.2%). m.p. >170 °C (dec.). 1H-NMR (CD2Cl2, 500 MHz): d7.77 (d, 3H, 3JHH = 9.6 Hz, -N=C*H*-), 7.66 (m, 3H, -OC*H*-), 7.50 (m, -N=CHC*H*-), 6.96 (m, 3H, -N=CHCH=C*H*-), 6.79 (d, 3H, 3JHH = 3.5 Hz, -CC*H*-), 6.59 (d of d, 3H, 3JHH= 3.5 Hz, 3JHH= 1.7 Hz, -CCHC*H*-), 4.98 (s, *H*2O), 3.79 (m, 3H, -CR2*H*), 2.13 [dt, 3H, 3JHH = 15.0 Hz, 3JHH = 3.9 Hz, -C*H*(Heq)-], 1.86 [d, 3H, 3JHH = 15.0 Hz, -C*H*(Hax)-], -0.08 (s, 1H, Zn-O*H*): *tetraphenylborate resonances;* d7.39 (m, 8H, Ar-*H*), 7.07 (m, 8H, Ar-*H*), 6.91 (m, 4H, Ar-*H*). IR cm-1: 3630(w), 3600 -3320(w), 3120(w), 3054(m), 2020(w), 2089(w), 1943(w), 1868(w), 1812(w), 1631(s), 1610(s), 1579(w,sh), 1560(w), 1470(m), 1425(w), 1390(m), 1362(w), 1269(w), 1215(m), 1172(m), 1122(m), 1074(w), 1019(m), 1000(w), 957(w), 929(w), 884(w), 748(m), 734(m), 708(m), 612(w), 590(w), 506(w). MS LRFAB (NOBA matrix) +ve ion m/z = 522 (*M*+ - BPh4-), 675 [*M+* + matrix (NOBA) - BPh4+] Elemental analysis for Zn[TFCT](OH)(BPh4)·2H2O, C51H48N3O4BZn·2H2O, actual (expected)%: C 69.46 (69.67), H 5.56 (5.96), N 4.75 (4.78).

**Synthesis of Complex 2**

Crystals of complex **2** were grown from a dichloromethane solution of **1** ( 0.05g 0.059 mmol) by the addition of 1 ml of methanol to a solution of **1** dissolved in 9 ml of dichloromethane after slow cooling over 2 days to yield pale yellow needle crystals of **2** in 30% yield (0.0163 g, 0.0089 mmol). The crystallographic analysis gives the complex of the form [Zn(OMe)L][Zn(OH)L](BPh4)21.8 MeOH 0.8CH2Cl2 [C105.6 H106.8 N6 O9.8 B2 Zn2 Cl1.6; mw = 1825.94] but both elemental analysis, IR and NMR spectroscopy did not confirm the identity of **2** but instead suggested that we have regenerated complex **1;** probably by decomposition with water.

For full crystallographic data, including details of refinement, please refer to the CIF file.
